# Supplementary material for: Antibacterial and anti-inflammatory ultrahigh molecular weight polyethylene/tea polyphenol blends for artificial joint applications
Source: Royal Society of Chemistry journal article supplement (doi:10.1039/d0tb01677b), 2020-01-01
Supplement: d0tb01677b1.pdf [file d0tb01677b1.pdf]

## Supporting Information:

# Antibacterial and anti-inflammatory ultrahigh molecular weight polyethylene/tea polyphenol blends for artificial joint applications

Yue Ren<sup>a,b,1</sup>, Fei-Yu Wang<sup>a,1,\*</sup>, Zi-Jian Chen<sup>a</sup>, Ri-Tong Lan<sup>b</sup>, Ren-Huan Huang<sup>a</sup>, Wan-Qun Fu<sup>a</sup>, Rizwan M. Gul<sup>c</sup>, Jing Wang<sup>a,\*</sup>, Jia-Zhuang Xu<sup>b</sup>, Zhong-Ming Li<sup>b</sup>

<sup>a</sup> *Department of Stomatology, Shanghai Tenth People's Hospital, Tongji University School of Medicine, 200072 Shanghai, China*

<sup>b</sup> *College of Polymer Science and Engineering, State Key Laboratory of Polymer Materials Engineering, Sichuan University, 610065 Chengdu, China*

<sup>c</sup> *Department of Mechanical Engineering, University of Engineering and Technology, 25120 Peshawar, Pakistan*

### Corresponding authors:

\*E-mail: wangfeiyu187@163.com (F. Y. W.)

\*E-mail: dentist\_tracy@tongji.edu.cn (J. W.)

### Author Contributions

<sup>1</sup> Y.R. and F.W. contributed equally to this work.

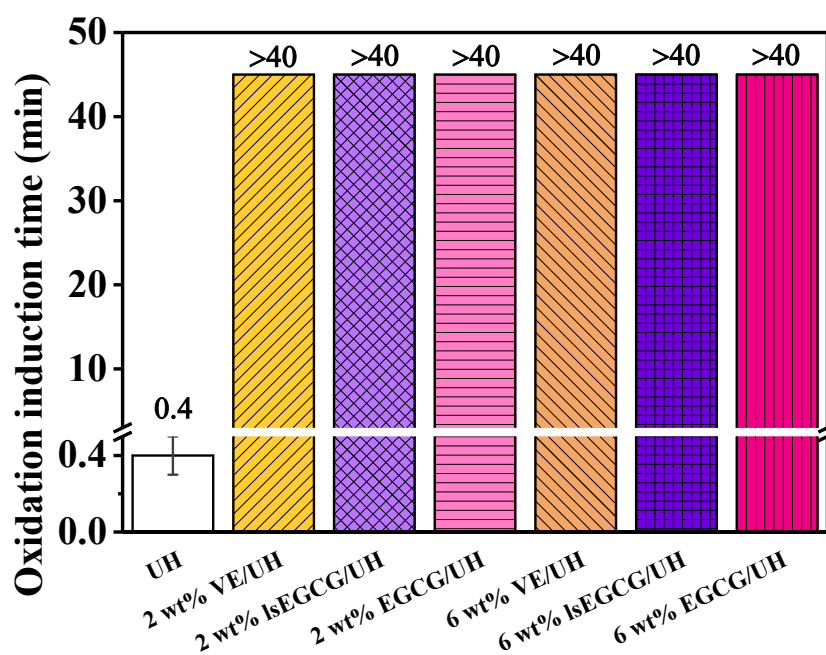

**Fig. S1.** OIT assessment of neat UHMWPE and HP/UHMWPE blends. UH represents UHMWPE.

**Table S1.** Melting points ( $T_m$ ) and crystallinity ( $X_c$ ) of UHMWPE blends with different HP concentration.

| Materials             | HP concentration | $T_m$ (°C)      | $X_c$ (%)      |
|-----------------------|------------------|-----------------|----------------|
| Neat UHMWPE           | 0 wt%            | $139.4 \pm 0.1$ | $61.8 \pm 1.2$ |
|                       | 2 wt%            | $136.2 \pm 0.2$ | $59.5 \pm 1.4$ |
|                       | 6 wt%            | $135.5 \pm 0.7$ | $58.0 \pm 0.1$ |
| <i>Is</i> EGCG/UHMWPE | 2 wt%            | $137.0 \pm 0.8$ | $59.9 \pm 2.3$ |
|                       | 6 wt%            | $136.0 \pm 0.2$ | $61.8 \pm 0.9$ |
| EGCG/UHMWPE           | 2 wt%            | $135.4 \pm 0.2$ | $57.8 \pm 0.5$ |
|                       | 6 wt%            | $136.5 \pm 0.4$ | $57.1 \pm 0.4$ |

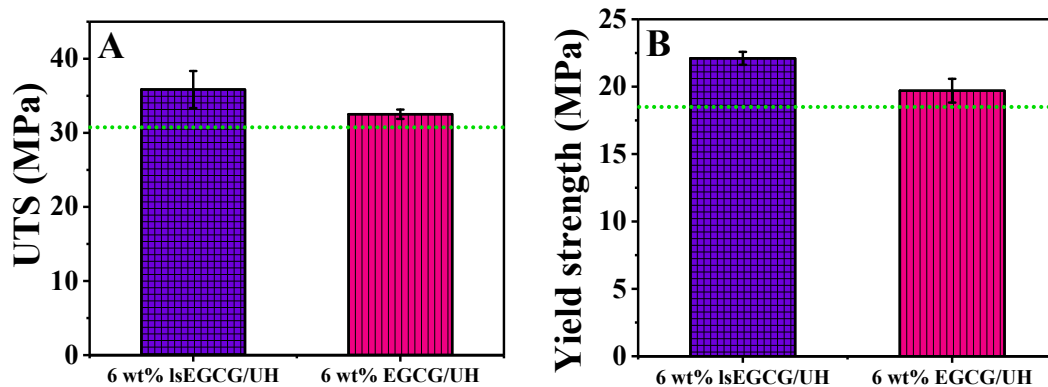

**Fig. S2.** Ultimate tensile strength (UTS) and yield strength of 6 wt% tea polyphenol/UHMWPE blends. The minimum value of clinically used UHMWPE is marked by the green dashed line.

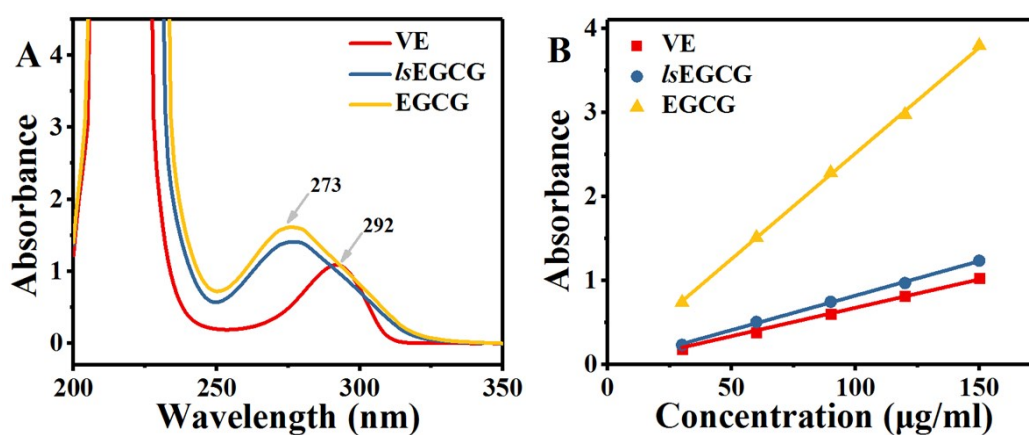

**Fig. S3.** UV spectra of hindered phenols (A) and standard curves as a function of concentration (B).
